# Supplementary material for: Evaluation of Formalin-Fixed and FFPE Tissues for Spatially Resolved Metabolomics and Drug Distribution Studies
Source: MDPI journal article supplement (doi:10.3390/ph15111307), 2022-10-23
Supplement: s1 [file s1]

Supplementary Information “Evaluation of formalin-fixed and FFPE tissues for spatially resolved metabolomics and drug distribution studies”

Andreas Dannhorn<sup>1,2</sup>, John Swales<sup>2</sup>, Gregory Hamm<sup>2</sup>, Nicole Strittmatter<sup>2</sup>, Hiromi Kudo<sup>1</sup>, Gareth Maglennon<sup>3</sup>, Richard JA Goodwin<sup>2,4</sup>, Zoltan Takats<sup>1,\*</sup>

1) Department of Metabolism, Digestion and Reproduction, Imperial College London, London, UK

2) Imaging & Data Analytics, Clinical Pharmacology and Safety Sciences, R&D, AstraZeneca, Cambridge, UK

3) Oncology Safety, Clinical Pharmacology and Safety Sciences, R&D, AstraZeneca, Cambridge, UK

4) Institute of Infection, Immunity and Inflammation, College of Medical, Veterinary and Life Sciences, University of Glasgow, Glasgow, UK

Table S1: Annotation details for the heatmap features:

| <u>Annotation</u>         | <u>Adduct</u>           | <u>Measured<br/>m/z</u> | <u>Theoretical<br/>m/z</u> | <u>Error<br/>[ppm]</u> | <u>Molecular formula</u>                                        | <u>MS/MS</u> |
|---------------------------|-------------------------|-------------------------|----------------------------|------------------------|-----------------------------------------------------------------|--------------|
| Serine                    | [M-H <sub>2</sub> O-H]- | 86.024                  | 86.025                     | 5                      | C <sub>3</sub> H <sub>7</sub> NO <sub>3</sub>                   |              |
| Leucine                   | [M+Cl]-                 | 166.064                 | 166.064                    | 0                      | C <sub>6</sub> H <sub>13</sub> NO <sub>2</sub>                  |              |
| Hydroxyleucine            | [M-H]-                  | 146.082                 | 146.082                    | 0                      | C <sub>6</sub> H <sub>13</sub> NO <sub>3</sub>                  |              |
| Methionine                | [M-H]-                  | 148.044                 | 148.044                    | 1                      | C <sub>5</sub> H <sub>11</sub> NO <sub>2</sub> S                |              |
| Acetyl-valine             | [M-H]-                  | 158.083                 | 158.082                    | 4                      | C <sub>7</sub> H <sub>13</sub> NO <sub>3</sub>                  |              |
| Phenylalanine             | [M-H]-                  | 164.072                 | 164.072                    | 0                      | C <sub>9</sub> H <sub>11</sub> NO <sub>2</sub>                  |              |
| Asparagine                | [M+Cl]-                 | 167.024                 | 167.023                    | 4                      | C <sub>4</sub> H <sub>8</sub> N <sub>2</sub> O <sub>3</sub>     |              |
| N-Acetylhistidine         | [M+Na]+                 | 220.070                 | 220.069                    | 2                      | C <sub>8</sub> H <sub>11</sub> N <sub>3</sub> O <sub>3</sub>    |              |
| GABA                      | [M-H]-                  | 102.056                 | 102.056                    | 2                      | C <sub>4</sub> H <sub>9</sub> NO <sub>2</sub>                   |              |
| Glutathione               | [M-H]-                  | 306.077                 | 306.077                    | 0                      | C <sub>10</sub> H <sub>17</sub> N <sub>3</sub> O <sub>6</sub> S |              |
| Hypoxanthine              | [M+K]+                  | 175.002                 | 175.002                    | 1                      | C <sub>5</sub> H <sub>4</sub> N <sub>4</sub> O                  |              |
| Xanthine                  | [M-H]-                  | 151.026                 | 151.026                    | 2                      | C <sub>5</sub> H <sub>4</sub> N <sub>4</sub> O <sub>2</sub>     |              |
| Dimethyluric acid         | [M-H]-                  | 195.052                 | 195.052                    | 0                      | C <sub>7</sub> H <sub>8</sub> N <sub>4</sub> O <sub>3</sub>     |              |
| Dimethylxanthine          | [M+Cl]-                 | 215.034                 | 215.034                    | 0                      | C <sub>7</sub> H <sub>8</sub> N <sub>4</sub> O <sub>2</sub>     |              |
| Methylguanidine           | [M-H <sub>2</sub> O-H]- | 146.047                 | 146.047                    | 1                      | C <sub>6</sub> H <sub>7</sub> N <sub>5</sub> O                  |              |
| Uridine                   | [M-H]-                  | 243.063                 | 243.062                    | 3                      | C <sub>9</sub> H <sub>12</sub> N <sub>2</sub> O <sub>6</sub>    |              |
| Inosine                   | [M-H]-                  | 267.072                 | 267.073                    | 5                      | C <sub>10</sub> H <sub>12</sub> N <sub>4</sub> O <sub>5</sub>   |              |
| Methyluridine             | [M+Cl]-                 | 293.055                 | 293.055                    | 0                      | C <sub>10</sub> H <sub>14</sub> N <sub>2</sub> O <sub>6</sub>   |              |
| UMP                       | [M-H]-                  | 323.029                 | 323.029                    | 2                      | C <sub>9</sub> H <sub>13</sub> N <sub>2</sub> O <sub>9</sub> P  |              |
| AMP                       | [M-H]-                  | 346.056                 | 346.056                    | 0                      | C <sub>10</sub> H <sub>14</sub> N <sub>5</sub> O <sub>7</sub> P |              |
| FA(16:2)                  | [M-H]-                  | 251.203                 | 251.202                    | 5                      | C <sub>16</sub> H <sub>28</sub> O <sub>2</sub>                  |              |
| FA(18:3)                  | [M-H]-                  | 277.216                 | 277.217                    | 5                      | C <sub>18</sub> H <sub>30</sub> O <sub>2</sub>                  |              |
| FA(20:5)                  | [M-H]-                  | 301.217                 | 301.217                    | 0                      | C <sub>20</sub> H <sub>30</sub> O <sub>2</sub>                  |              |
| FA(20:4)                  | [M-H]-                  | 303.233                 | 303.233                    | 0                      | C <sub>20</sub> H <sub>32</sub> O <sub>2</sub>                  |              |
| FA(22:6)                  | [M-H]-                  | 327.235                 | 327.233                    | 5                      | C <sub>22</sub> H <sub>32</sub> O <sub>2</sub>                  |              |
| FA(22:5)                  | [M-H]-                  | 329.250                 | 329.249                    | 5                      | C <sub>22</sub> H <sub>34</sub> O <sub>2</sub>                  |              |
| FA(22:4)                  | [M-H]-                  | 331.266                 | 331.264                    | 4                      | C <sub>22</sub> H <sub>36</sub> O <sub>2</sub>                  |              |
| FA(12:1(O))               | [M+Na]+                 | 235.130                 | 235.130                    | 1                      | C <sub>12</sub> H <sub>20</sub> O <sub>3</sub>                  |              |
| FA16:2(OH))               | [M-H]-                  | 267.196                 | 267.197                    | 2                      | C <sub>16</sub> H <sub>28</sub> O <sub>3</sub>                  |              |
| FA(18:3(OH))              | [M-H]-                  | 293.213                 | 293.212                    | 3                      | C <sub>18</sub> H <sub>30</sub> O <sub>3</sub>                  |              |
| FA(18:2(OH))              | [M-H]-                  | 295.229                 | 295.228                    | 3                      | C <sub>18</sub> H <sub>32</sub> O <sub>3</sub>                  |              |
| FA(18:1(OH))              | [M-H]-                  | 297.244                 | 297.244                    | 3                      | C <sub>18</sub> H <sub>34</sub> O <sub>3</sub>                  |              |
| FA(18:3(OH3))             | [M-H]-                  | 325.203                 | 325.202                    | 4                      | C <sub>18</sub> H <sub>30</sub> O <sub>5</sub>                  |              |
| FA(18:1(OH3))             | [M-H]-                  | 329.235                 | 329.233                    | 4                      | C <sub>18</sub> H <sub>34</sub> O <sub>5</sub>                  |              |
| FA(20:2(OH))              | [M-H]-                  | 323.258                 | 323.259                    | 5                      | C <sub>20</sub> H <sub>36</sub> O <sub>3</sub>                  |              |
| FA(20:4(OH2))             | [M-H]-                  | 335.223                 | 335.223                    | 2                      | C <sub>20</sub> H <sub>32</sub> O <sub>4</sub>                  |              |
| FA(20:3(OH2))             | [M-H]-                  | 337.239                 | 337.238                    | 2                      | C <sub>20</sub> H <sub>34</sub> O <sub>4</sub>                  |              |
| FA(20:2(OH2))             | [M-H]-                  | 339.255                 | 339.254                    | 2                      | C <sub>20</sub> H <sub>36</sub> O <sub>4</sub>                  |              |
| FA(20:5(OH3))             | [M+Na]+                 | 373.197                 | 373.198                    | 2                      | C <sub>20</sub> H <sub>30</sub> O <sub>5</sub>                  |              |
| FA(20:4(OH3))             | [M+Na]+                 | 375.213                 | 375.214                    | 1                      | C <sub>20</sub> H <sub>32</sub> O <sub>5</sub>                  |              |
| FA(22:6(OH))              | [M-H]-                  | 343.228                 | 343.228                    | 0                      | C <sub>22</sub> H <sub>32</sub> O <sub>3</sub>                  |              |
| FA(22:5(OH))              | [M-H]-                  | 345.243                 | 345.244                    | 0                      | C <sub>22</sub> H <sub>34</sub> O <sub>3</sub>                  |              |
| FA(22:4(OH))              | [M-H]-                  | 347.259                 | 347.259                    | 0                      | C <sub>22</sub> H <sub>36</sub> O <sub>3</sub>                  |              |
| FA(22:5(OH2))             | [M-H]-                  | 361.241                 | 361.238                    | 6                      | C <sub>22</sub> H <sub>34</sub> O <sub>4</sub>                  |              |
| Phosphate                 | [M-H]-                  | 96.970                  | 96.970                     | 3                      | H <sub>3</sub> PO <sub>4</sub>                                  |              |
| KCl                       | [M+Cl]-                 | 108.902                 | 108.903                    | 5                      | KCl                                                             |              |
| KCl                       | [M+K]+                  | 112.896                 | 112.895                    | 5                      | KCl                                                             |              |
| Lactate                   | [M-H]-                  | 89.025                  | 89.024                     | 2                      | C <sub>3</sub> H <sub>6</sub> O <sub>3</sub>                    |              |
| Hydroxymethylbutyric acid | [M-H]-                  | 117.055                 | 117.056                    | 4                      | C <sub>5</sub> H <sub>10</sub> O <sub>3</sub>                   |              |
| Hydroxynonenoic acid      | [M+Na]+                 | 195.100                 | 195.099                    | 5                      | C <sub>9</sub> H <sub>16</sub> O <sub>3</sub>                   |              |
| Mevalonolactone           | [M-H]-                  | 129.056                 | 129.056                    | 2                      | C <sub>6</sub> H <sub>10</sub> O <sub>3</sub>                   |              |
| Citrate                   | [M-H <sub>2</sub> O-H]- | 173.008                 | 173.009                    | 4                      | C <sub>6</sub> H <sub>8</sub> O <sub>7</sub>                    |              |
| Ascorbic acid             | [M-H]-                  | 175.024                 | 175.025                    | 5                      | C <sub>6</sub> H <sub>8</sub> O <sub>6</sub>                    |              |
| Ascorbic acid sulfate     | [M-H]-                  | 254.983                 | 254.982                    | 3                      | C <sub>6</sub> H <sub>8</sub> O <sub>9</sub> S                  |              |
| Pantothenic acid          | [M-H]-                  | 218.102                 | 218.103                    | 6                      | C <sub>9</sub> H <sub>17</sub> NO <sub>5</sub>                  |              |
| Taurine                   | [M-H]-                  | 124.007                 | 124.007                    | 1                      | C <sub>2</sub> H <sub>7</sub> NO <sub>3</sub> S                 |              |
| Choline                   | [M+H]+                  | 104.107                 | 104.107                    | 3                      | C <sub>5</sub> H <sub>13</sub> NO                               |              |
| Phosphocholine            | [M+H]+                  | 184.074                 | 184.073                    | 2                      | C <sub>5</sub> H <sub>14</sub> NO <sub>4</sub> P                |              |
| Betaine                   | [M+H]+                  | 118.087                 | 118.086                    | 4                      | C <sub>5</sub> H <sub>11</sub> NO <sub>2</sub>                  |              |
| Creatine                  | [M+H]+                  | 132.077                 | 132.077                    | 1                      | C <sub>4</sub> H <sub>9</sub> N <sub>3</sub> O <sub>2</sub>     |              |
| Carnitine                 | [M+K]+                  | 200.069                 | 200.068                    | 1                      | C <sub>7</sub> H <sub>15</sub> NO <sub>3</sub>                  |              |
| Acethylcarnitine          | [M+H]+                  | 204.123                 | 204.123                    | 0                      | C <sub>9</sub> H <sub>17</sub> NO <sub>4</sub>                  |              |
| Butyryl-carnitine         | [M+H]+                  | 232.154                 | 232.154                    | 2                      | C <sub>11</sub> H <sub>21</sub> NO <sub>4</sub>                 |              |
| Deoxyglucose              | [M+Cl]-                 | 199.037                 | 199.038                    | 4                      | C <sub>6</sub> H <sub>12</sub> O <sub>5</sub>                   |              |
| Glucosamine               | [M+Cl]-                 | 214.048                 | 214.049                    | 5                      | C <sub>6</sub> H <sub>13</sub> NO <sub>5</sub>                  |              |
| Glucose                   | [M+K]+                  | 219.026                 | 219.027                    | 2                      | C <sub>6</sub> H <sub>12</sub> O <sub>6</sub>                   |              |

|                                 |            |         |         |   |                                                                 |     |
|---------------------------------|------------|---------|---------|---|-----------------------------------------------------------------|-----|
| Glucose-phosphate               | [M-H]-     | 259.021 | 259.022 | 4 | C <sub>6</sub> H <sub>13</sub> O <sub>9</sub> P                 |     |
| LPE(18:0)                       | [M+Na]+    | 504.305 | 504.306 | 1 | C <sub>23</sub> H <sub>48</sub> NO <sub>7</sub> P               |     |
| LPE(20:1)                       | [M-H]-     | 506.325 | 506.325 | 1 | C <sub>25</sub> H <sub>60</sub> NO <sub>7</sub> P               |     |
| LPE(20:0)                       | [M-H]-     | 508.340 | 508.341 | 1 | C <sub>25</sub> H <sub>62</sub> NO <sub>7</sub> P               |     |
| PE(36:2)                        | [M+K]+     | 782.508 | 782.509 | 1 | C <sub>41</sub> H <sub>78</sub> NO <sub>8</sub> P               | Yes |
| PE(36:3)                        | [M-H]-     | 740.525 | 740.524 | 2 | C <sub>41</sub> H <sub>76</sub> NO <sub>8</sub> P               | Yes |
| PE(36:4)                        | [M+K]+     | 778.476 | 778.478 | 2 | C <sub>41</sub> H <sub>74</sub> NO <sub>8</sub> P               | Yes |
| PE(38:6)                        | [M-H]-     | 762.511 | 762.508 | 4 | C <sub>43</sub> H <sub>74</sub> NO <sub>8</sub> P               | Yes |
| PE(38:5)                        | [M-H]-     | 764.526 | 764.524 | 4 | C <sub>43</sub> H <sub>76</sub> NO <sub>8</sub> P               | Yes |
| PE(38:4)                        | [M-H]-     | 766.542 | 766.539 | 3 | C <sub>43</sub> H <sub>78</sub> NO <sub>8</sub> P               | Yes |
| PE(38:2)                        | [M+K]+     | 810.539 | 810.540 | 2 | C <sub>43</sub> H <sub>82</sub> NO <sub>8</sub> P               |     |
| PE(40:4)                        | [M+K]+     | 834.539 | 834.540 | 2 | C <sub>45</sub> H <sub>82</sub> NO <sub>8</sub> P               |     |
| PE(34:0(CH2))                   | [M+Na]+    | 754.533 | 754.535 | 2 | C <sub>40</sub> H <sub>78</sub> NO <sub>8</sub> P               |     |
| PE(44:10(OH))                   | [M-H]-     | 854.536 | 854.534 | 2 | C <sub>49</sub> H <sub>78</sub> NO <sub>9</sub> P               |     |
| PE(44:9(OH))                    | [M-H]-     | 856.551 | 856.550 | 2 | C <sub>49</sub> H <sub>80</sub> NO <sub>9</sub> P               |     |
| LPC(16:1)                       | [M+Na]+    | 516.305 | 516.306 | 1 | C <sub>24</sub> H <sub>48</sub> NO <sub>7</sub> P               |     |
| LPC(16:0)                       | [M+Na]+    | 518.320 | 518.321 | 3 | C <sub>24</sub> H <sub>50</sub> NO <sub>7</sub> P               |     |
| LPC(18:2)                       | [M+Na]+    | 542.320 | 542.321 | 3 | C <sub>26</sub> H <sub>50</sub> NO <sub>7</sub> P               |     |
| LPC(18:1)                       | [M+Na]+    | 544.336 | 544.337 | 2 | C <sub>26</sub> H <sub>52</sub> NO <sub>7</sub> P               |     |
| LPC(18:0)                       | [M+Na]+    | 546.352 | 546.352 | 1 | C <sub>26</sub> H <sub>54</sub> NO <sub>7</sub> P               |     |
| LPC(20:4)                       | [M+K]+     | 582.294 | 582.295 | 1 | C <sub>28</sub> H <sub>50</sub> NO <sub>7</sub> P               |     |
| PC(34:2)                        | [M+H]+     | 758.568 | 758.569 | 1 | C <sub>42</sub> H <sub>80</sub> NO <sub>8</sub> P               | Yes |
| PC(34:4)                        | [M+K]+     | 792.491 | 792.493 | 3 | C <sub>42</sub> H <sub>76</sub> NO <sub>8</sub> P               | Yes |
| PC(34:2)                        | [M+K]+     | 796.523 | 796.525 | 2 | C <sub>42</sub> H <sub>80</sub> NO <sub>8</sub> P               | Yes |
| PC(34:1)                        | [M+K]+     | 798.538 | 798.540 | 3 | C <sub>42</sub> H <sub>82</sub> NO <sub>8</sub> P               | Yes |
| PC(36:2)                        | [M+K]+     | 824.554 | 824.557 | 3 | C <sub>44</sub> H <sub>84</sub> NO <sub>8</sub> P               | Yes |
| PC(38:4)                        | [M+K]+     | 848.555 | 848.556 | 1 | C <sub>46</sub> H <sub>84</sub> NO <sub>8</sub> P               | Yes |
| PC(40:8)                        | [M+K]+     | 868.527 | 868.525 | 3 | C <sub>48</sub> H <sub>80</sub> NO <sub>8</sub> P               | Yes |
| LPC(18:2(OH))                   | [M+Na]+    | 558.315 | 558.316 | 3 | C <sub>26</sub> H <sub>50</sub> NO <sub>8</sub> P               |     |
| LPC(20:4(OH))                   | [M+Na]+    | 582.314 | 582.316 | 3 | C <sub>28</sub> H <sub>50</sub> NO <sub>8</sub> P               |     |
| PC(25:0(COOH))                  | [M+Na]+    | 688.415 | 688.415 | 1 | C <sub>33</sub> H <sub>64</sub> NO <sub>10</sub> P              |     |
| PC(34:2(OH))                    | [M+Na]+    | 796.544 | 796.546 | 3 | C <sub>42</sub> H <sub>80</sub> NO <sub>9</sub> P               | Yes |
| PC(36:4(OH))                    | [M+Na]+    | 820.544 | 820.546 | 2 | C <sub>44</sub> H <sub>80</sub> NO <sub>9</sub> P               | Yes |
| PC(36:3(OH))                    | [M+Na]+    | 822.560 | 822.561 | 2 | C <sub>44</sub> H <sub>82</sub> NO <sub>9</sub> P               | Yes |
| PC(36:2(OH))                    | [M+Na]+    | 824.575 | 824.577 | 3 | C <sub>44</sub> H <sub>84</sub> NO <sub>9</sub> P               | Yes |
| PC(38:4(OH))                    | [M+Na]+    | 848.576 | 848.577 | 1 | C <sub>46</sub> H <sub>84</sub> NO <sub>9</sub> P               |     |
| LPS(20:0)                       | [M-H]-     | 552.332 | 552.331 | 1 | C <sub>26</sub> H <sub>52</sub> NO <sub>9</sub> P               |     |
| PS(36:4)                        | [M-H]-     | 782.500 | 782.498 | 3 | C <sub>42</sub> H <sub>74</sub> NO <sub>10</sub> P              | Yes |
| PS(36:2)                        | [M-H]-     | 786.532 | 786.529 | 3 | C <sub>42</sub> H <sub>76</sub> NO <sub>10</sub> P              | Yes |
| PS(38:4)                        | [M-H]-     | 810.533 | 810.529 | 5 | C <sub>44</sub> H <sub>78</sub> NO <sub>10</sub> P              | Yes |
| PS(40:6)                        | [M-H]-     | 834.531 | 834.529 | 2 | C <sub>46</sub> H <sub>78</sub> NO <sub>10</sub> P              | Yes |
| PS(34:0)-Me                     | [M-H]-     | 774.531 | 774.529 | 2 | C <sub>41</sub> H <sub>78</sub> NO <sub>10</sub> P              | Yes |
| PS(38:4)-Me                     | [M-H]-     | 822.534 | 822.529 | 5 | C <sub>45</sub> H <sub>78</sub> NO <sub>10</sub> P              | Yes |
| LPI((16:0) [M-H] <sup>-</sup> ) | [M-H]-     | 571.288 | 571.289 | 1 | C <sub>26</sub> H <sub>49</sub> O <sub>12</sub> P               |     |
| LPI(18:1) [M-H] <sup>-</sup>    | [M-H]-     | 597.305 | 597.305 | 1 | C <sub>27</sub> H <sub>51</sub> O <sub>12</sub> P               |     |
| LPI(18:0) [M-H] <sup>-</sup>    | [M-H]-     | 599.321 | 599.320 | 1 | C <sub>27</sub> H <sub>53</sub> O <sub>12</sub> P               |     |
| PI(36:4) [M-H] <sup>-</sup>     | [M-H]-     | 857.522 | 857.519 | 4 | C <sub>45</sub> H <sub>79</sub> O <sub>13</sub> P               | Yes |
| PI(38:4) [M-H] <sup>-</sup>     | [M-H]-     | 885.555 | 885.550 | 6 | C <sub>47</sub> H <sub>83</sub> O <sub>13</sub> P               | Yes |
| Sphingosine (d16:1-P)           | [M-H2O-H]- | 332.198 | 332.200 | 5 | C <sub>16</sub> H <sub>34</sub> NO <sub>5</sub> P               |     |
| Ceramide (d42:1)                | [M+K]+     | 688.599 | 688.600 | 2 | C <sub>42</sub> H <sub>83</sub> NO <sub>3</sub>                 |     |
| SM(d34:1)                       | [M+K]+     | 741.529 | 741.532 | 4 | C <sub>39</sub> H <sub>79</sub> N <sub>2</sub> O <sub>6</sub> P |     |
| Cortisol                        | [M+Cl]-    | 397.177 | 397.179 | 5 | C <sub>21</sub> H <sub>30</sub> O <sub>5</sub>                  |     |
| Dihydrocortisol                 | [M+Cl]-    | 399.193 | 399.194 | 5 | C <sub>21</sub> H <sub>32</sub> O <sub>5</sub>                  |     |
| Cholesterol sulfate             | [M-H]-     | 465.305 | 465.304 | 1 | C <sub>27</sub> H <sub>46</sub> O <sub>4</sub> S                |     |
| Taurodeoxycholic acid           | [M-H]-     | 498.290 | 498.289 | 0 | C <sub>26</sub> H <sub>45</sub> NO <sub>6</sub> S               |     |
| Taurocholic acid                | [M-H]-     | 514.283 | 514.284 | 3 | C <sub>26</sub> H <sub>45</sub> NO <sub>6</sub> S               |     |
| Hydroxycholecalciferol          | [M+Na]+    | 423.322 | 423.323 | 3 | C <sub>27</sub> H <sub>44</sub> O <sub>2</sub>                  |     |
| CE(20:4)                        | [M+K]+     | 711.545 | 711.547 | 3 | C <sub>47</sub> H <sub>76</sub> O <sub>2</sub>                  |     |
| MG(18:1)                        | [M+K]+     | 395.255 | 395.255 | 0 | C <sub>21</sub> H <sub>40</sub> O <sub>4</sub>                  |     |
| MG(18:0)                        | [M+K]+     | 397.270 | 397.271 | 2 | C <sub>21</sub> H <sub>42</sub> O <sub>4</sub>                  |     |
| DG(32:0)                        | [M+K]+     | 607.472 | 607.469 | 4 | C <sub>35</sub> H <sub>68</sub> O <sub>5</sub>                  |     |
| DG(34:2)                        | [M+K]+     | 631.468 | 631.469 | 3 | C <sub>37</sub> H <sub>68</sub> O <sub>5</sub>                  |     |
| DG(34:1)                        | [M+K]+     | 633.485 | 633.485 | 0 | C <sub>37</sub> H <sub>70</sub> O <sub>5</sub>                  |     |
| DG(36:4)                        | [M+K]+     | 655.467 | 655.469 | 3 | C <sub>39</sub> H <sub>68</sub> O <sub>5</sub>                  |     |
| DG(36:3)                        | [M+K]+     | 657.484 | 657.485 | 2 | C <sub>39</sub> H <sub>70</sub> O <sub>5</sub>                  |     |
| DG(38:4)                        | [M+K]+     | 683.499 | 683.501 | 2 | C <sub>41</sub> H <sub>72</sub> O <sub>5</sub>                  |     |

Table S2: Statistical information for annotated heatmap features:

| <u>Annotation</u>          | <u>Polarity</u> | <u>Median Abundances [a.u.*]</u> |                               |                           |                              |                   | <u>Statistical significance P**</u>          |                                             |                                  |                                     |
|----------------------------|-----------------|----------------------------------|-------------------------------|---------------------------|------------------------------|-------------------|----------------------------------------------|---------------------------------------------|----------------------------------|-------------------------------------|
|                            |                 | <u>Fresh-Frozen Kidney</u>       | <u>Formal in-Fixed Kidney</u> | <u>Fresh-Frozen Liver</u> | <u>Formal in-Fixed Liver</u> | <u>FFPE liver</u> | <u>Fresh-Frozen v Formal in-Fixed Kidney</u> | <u>Fresh-Frozen v Formal in-Fixed Liver</u> | <u>Fresh-Frozen v FFPE Liver</u> | <u>Formal in-Fixed v FFPE liver</u> |
| Serine                     | -               | 2968                             | 0.000                         | 1445                      | 0.000                        | 0.000             | <0.001                                       | <0.001                                      | <0.001                           | <0.001                              |
| Leucine                    | -               | 2192                             | 0.000                         | 5368                      | 0.000                        | 0.000             | <0.001                                       | <0.001                                      | <0.001                           | <0.001                              |
| Hydroxy-leucine            | -               | 4940                             | 0.000                         | 0.000                     | 0.000                        | 18802             | <0.001                                       | <0.001                                      | <0.001                           | <0.001                              |
| Methionine                 | -               | 4382                             | 1697                          | 0.000                     | 2938                         | 0.000             | <0.001                                       | <0.001                                      | <0.001                           | <0.001                              |
| Acetyl-valine              | -               | 5350                             | 1974                          | 1741                      | 2938                         | 71950             | <0.001                                       | <0.001                                      | <0.001                           | <0.001                              |
| Phenylalanine              | -               | 2689                             | 0.000                         | 2528                      | 0.000                        | 0.000             | <0.001                                       | <0.001                                      | <0.001                           | <0.001                              |
| Asparagine                 | -               | 8127                             | 874.0                         | 20272                     | 0.000                        | 1591              | <0.001                                       | <0.001                                      | <0.001                           | <0.001                              |
| Acethyl-histidine          | +               | 0.000                            | 3347                          | 0.000                     | 1603                         | 0.000             | <0.001                                       | <0.001                                      | <0.001                           | <0.001                              |
| GABA                       | -               | 40195                            | 0.000                         | 3147                      | 0.000                        | 0.000             | <0.001                                       | <0.001                                      | <0.001                           | <0.001                              |
| Glutathione                | -               | 14495                            | 0.000                         | 33063                     | 0.000                        | 0.000             | <0.001                                       | <0.001                                      | <0.001                           | ns                                  |
| Hypoxanthine               | +               | 5631                             | 0.000                         | 1447                      | 0.000                        | 0.000             | <0.001                                       | <0.001                                      | <0.001                           | <0.001                              |
| Xanthine                   | -               | 86253                            | 20129                         | 42701                     | 2938                         | 0.000             | <0.001                                       | <0.001                                      | <0.001                           | <0.001                              |
| Dimethyluric acid          | -               | 38836                            | 18278                         | 232805                    | 0.000                        | 0.000             | <0.001                                       | <0.001                                      | <0.001                           | <0.001                              |
| Dimethylxanthine           | -               | 337022                           | 26728                         | 501221                    | 0.000                        | 0.000             | <0.001                                       | <0.001                                      | <0.001                           | <0.001                              |
| Methyl-guanidine           | -               | 427032                           | 2636                          | 27990                     | 1741                         | 2093              | <0.001                                       | <0.001                                      | <0.001                           | <0.001                              |
| Uridine                    | -               | 15874                            | 3755                          | 5165                      | 0.000                        | 0.000             | <0.001                                       | <0.001                                      | <0.001                           | <0.001                              |
| Inosine                    | -               | 33698                            | 12791                         | 13512                     | 5736                         | 0.000             | <0.001                                       | <0.001                                      | <0.001                           | <0.001                              |
| Methyluridine              | -               | 774.4                            | 834.0                         | 5075                      | 1057                         | 2463              | <0.001                                       | <0.001                                      | <0.001                           | <0.001                              |
| UMP                        | -               | 8795                             | 0.000                         | 10529                     | 0.000                        | 0.000             | <0.001                                       | <0.001                                      | <0.001                           | ns                                  |
| AMP                        | -               | 59441                            | 0.000                         | 14343                     | 0.000                        | 0.000             | <0.001                                       | <0.001                                      | <0.001                           | ns                                  |
| FA(16:2)                   | -               | 7151                             | 4578                          | 6194                      | 3894                         | 0.000             | <0.001                                       | <0.001                                      | <0.001                           | <0.001                              |
| FA(18:3)                   | -               | 45320                            | 42495                         | 162445                    | 66291                        | 0.000             | <0.001                                       | <0.001                                      | <0.001                           | <0.001                              |
| FA(20:5)                   | -               | 29111                            | 34088                         | 109682                    | 44199                        | 0.000             | <0.001                                       | <0.001                                      | <0.001                           | <0.001                              |
| FA(20:4)                   | -               | 422356                           | 100000<br>0                   | 458781                    | 124522<br>0                  | 2480              | <0.001                                       | <0.001                                      | <0.001                           | <0.001                              |
| FA(22:6)                   | -               | 109054                           | 65832                         | 188029                    | 139123                       | 0.000             | <0.001                                       | <0.001                                      | <0.001                           | <0.001                              |
| FA(22:5)                   | -               | 47151                            | 27765                         | 131519                    | 54772                        | 0.000             | <0.001                                       | <0.001                                      | <0.001                           | <0.001                              |
| FA(22:4)                   | -               | 27475                            | 37325                         | 80100                     | 31703                        | 0.000             | <0.001                                       | <0.001                                      | <0.001                           | <0.001                              |
| FA(12:1(O))                | +               | 0.000                            | 7757                          | 0.000                     | 18471                        | 281386            | <0.001                                       | <0.001                                      | <0.001                           | <0.001                              |
| FA16:2(OH))                | -               | 1575                             | 12791                         | 6185                      | 5736                         | 1056              | <0.001                                       | <0.001                                      | <0.001                           | <0.001                              |
| FA(18:3(OH))               | -               | 9043                             | 197702                        | 116059                    | 206160                       | 0.000             | <0.001                                       | <0.001                                      | <0.001                           | <0.001                              |
| FA(18:2(OH))               | -               | 11335                            | 283032                        | 87898                     | 309557                       | 1798              | <0.001                                       | <0.001                                      | <0.001                           | <0.001                              |
| FA(18:1(OH))               | -               | 8015                             | 174157                        | 26568                     | 162739                       | 2370              | <0.001                                       | <0.001                                      | <0.001                           | <0.001                              |
| FA(18:3(OH3))              | -               | 1270                             | 10004                         | 7600                      | 10763                        | 9325              | <0.001                                       | <0.001                                      | <0.001                           | <0.001                              |
| FA(18:1(OH3))              | -               | 2738                             | 54362                         | 1776                      | 35624                        | 2481              | <0.001                                       | <0.001                                      | 0.0339                           | <0.001                              |
| FA(20:2(OH))               | -               | 0.000                            | 8612                          | 2299                      | 12265                        | 0.000             | <0.001                                       | <0.001                                      | <0.001                           | <0.001                              |
| FA(20:4(OH2))              | -               | 2554                             | 67268                         | 6589                      | 63020                        | 0.000             | <0.001                                       | <0.001                                      | <0.001                           | <0.001                              |
| FA(20:3(OH2))              | -               | 0.000                            | 44502                         | 3647                      | 43371                        | 1978              | <0.001                                       | <0.001                                      | <0.001                           | <0.001                              |
| FA(20:2(OH2))              | -               | 0.000                            | 12600                         | 2319                      | 11590                        | 0.000             | <0.001                                       | <0.001                                      | <0.001                           | <0.001                              |
| FA(20:5(OH3))              | +               | 0.000                            | 5263                          | 0.000                     | 5122                         | 977.9             | <0.001                                       | <0.001                                      | <0.001                           | <0.001                              |
| FA(20:4(OH3))              | +               | 0.000                            | 12986                         | 0.000                     | 13915                        | 1824              | <0.001                                       | <0.001                                      | <0.001                           | <0.001                              |
| FA(22:6(OH))               | -               | 1989                             | 16678                         | 9480                      | 22441                        | 9165              | <0.001                                       | <0.001                                      | ns                               | <0.001                              |
| FA(22:5(OH))               | -               | 798.8                            | 7505                          | 6577                      | 10046                        | 2270              | <0.001                                       | <0.001                                      | <0.001                           | <0.001                              |
| FA(22:4(OH))               | -               | 0.000                            | 4272                          | 2519                      | 4190                         | 0.000             | <0.001                                       | <0.001                                      | <0.001                           | <0.001                              |
| FA(22:5(OH2))              | -               | 0.000                            | 7833                          | 3964                      | 8265                         | 0.000             | <0.001                                       | <0.001                                      | <0.001                           | <0.001                              |
| Phosphate                  | -               | 132675                           | 318868                        | 48681                     | 111410                       | 3935              | <0.001                                       | <0.001                                      | <0.001                           | <0.001                              |
| KCL                        | -               | 10452                            | 0.000                         | 4815                      | 0.000                        | 0.000             | <0.001                                       | <0.001                                      | <0.001                           | ns                                  |
| KCl                        | +               | 8183                             | 0.000                         | 6827                      | 0.000                        | 0.000             | <0.001                                       | <0.001                                      | <0.001                           | ns                                  |
| Lactate                    | -               | 693776                           | 67077                         | 1445                      | 0.000                        | 101149            | <0.001                                       | <0.001                                      | <0.001                           | <0.001                              |
| Hydroxymethyl butyric acid | -               | 4450                             | 997.3                         | 1549                      | 9037                         | 198339            | <0.001                                       | <0.001                                      | <0.001                           | <0.001                              |
| Hydroxy-nonenic acid       | +               | 38836                            | 18278                         | 232805                    | 0.000                        | 0.000             | <0.001                                       | <0.001                                      | <0.001                           | <0.001                              |
| Mevalono-lactone           | -               | 8838                             | 5717                          | 6452                      | 601.1                        | 454411            | <0.001                                       | <0.001                                      | <0.001                           | <0.001                              |
| Citrate                    | -               | 38616                            | 0.000                         | 24215                     | 0.000                        | 2633              | <0.001                                       | <0.001                                      | <0.001                           | <0.001                              |

|                            |   |        |        |        |        |       |        |        |        |        |
|----------------------------|---|--------|--------|--------|--------|-------|--------|--------|--------|--------|
| Ascorbic acid              | - | 279919 | 0.000  | 181887 | 0.000  | 0.000 | <0.001 | <0.001 | <0.001 | <0.001 |
| Ascorbic acid sulfate      | - | 22250  | 0.000  | 13496  | 366720 | 0.000 | <0.001 | <0.001 | <0.001 | <0.001 |
| Pantothenic acid           | - | 87613  | 1536   | 4556   | 0.000  | 0.000 | <0.001 | <0.001 | <0.001 | <0.001 |
| Taurine                    | - | 337618 | 849.1  | 24886  | 601.1  | 1018  | <0.001 | <0.001 | <0.001 | <0.001 |
| Choline                    | + | 761457 | 230829 | 259560 | 239633 | 37457 | <0.001 | <0.001 | <0.001 | <0.001 |
| Phospho-choline            | + | 5767   | 2293   | 3939   | 0.000  | 0.000 | <0.001 | <0.001 | <0.001 | <0.001 |
| Betaine                    | + | 95027  | 34383  | 162982 | 18829  | 0.000 | <0.001 | <0.001 | <0.001 | <0.001 |
| Creatine                   | + | 4120   | 0.000  | 0.000  | 0.000  | 0.000 | <0.001 | <0.001 | <0.001 | ns     |
| Carnitine                  | + | 12371  | 0.000  | 5185   | 0.000  | 0.000 | <0.001 | <0.001 | <0.001 | <0.001 |
| Acethyl-carnitine          | + | 28411  | 1964   | 26494  | 0.000  | 0.000 | <0.001 | <0.001 | <0.001 | <0.001 |
| Butyryl-carnitine          | + | 4274   | 0.000  | 4620   | 0.000  | 0.000 | <0.001 | <0.001 | <0.001 | <0.001 |
| Deoxyglucose               | - | 38836  | 0.000  | 1833   | 0.000  | 0.000 | <0.001 | <0.001 | <0.001 | <0.001 |
| Glucosamine                | - | 39800  | 521.0  | 85146  | 0.000  | 0.000 | <0.001 | <0.001 | <0.001 | <0.001 |
| Glucose                    | - | 18691  | 3195   | 45633  | 1858   | 795.3 | <0.001 | <0.001 | <0.001 | <0.001 |
| Glucose-phosphate          | - | 22250  | 1201   | 12719  | 366720 | 0.000 | <0.001 | <0.001 | <0.001 | <0.001 |
| LPE(18:0)                  | + | 0.000  | 4565   | 0.000  | 0.000  | 0.000 | <0.001 | <0.001 | ns     | <0.001 |
| LPE(20:1)                  | - | 0.000  | 2036   | 0.000  | 2485   | 0.000 | <0.001 | <0.001 | ns     | <0.001 |
| LPE(20:0)                  | - | 0.000  | 10506  | 0.000  | 1116   | 0.000 | <0.001 | <0.001 | <0.001 | <0.001 |
| PE(36:2)                   | + | 4575   | 0.000  | 9697   | 0.000  | 0.000 | <0.001 | <0.001 | <0.001 | <0.001 |
| PE(36:3)                   | - | 0.000  | 0.000  | 2617   | 0.000  | 23232 | <0.001 | <0.001 | <0.001 | <0.001 |
| PE(36:4)                   | + | 11714  | 0.000  | 13751  | 0.000  | 0.000 | <0.001 | <0.001 | <0.001 | <0.001 |
| PE(38:6)                   | - | 2547   | 0.000  | 5732   | 0.000  | 0.000 | <0.001 | <0.001 | <0.001 | ns     |
| PE(38:5)                   | - | 6734   | 0.000  | 5851   | 0.000  | 0.000 | <0.001 | <0.001 | <0.001 | ns     |
| PE(38:4)                   | - | 24856  | 0.000  | 14418  | 0.000  | 0.000 | <0.001 | <0.001 | <0.001 | ns     |
| PE(38:2)                   | + | 2597   | 0.000  | 7455   | 266048 | 0.000 | <0.001 | <0.001 | <0.001 | <0.001 |
| PE(40:4)                   | + | 0.000  | 0.000  | 11536  | 0.000  | 0.000 | ns     | <0.001 | <0.001 | ns     |
| PE(34:0(CH <sub>2</sub> )) | + | 15214  | 35923  | 9618   | 0.000  | 0.000 | <0.001 | <0.001 | <0.001 | <0.001 |
| PE(44:10(OH))              | - | 0.000  | 2773   | 0.000  | 2330   | 0.000 | <0.001 | <0.001 | <0.001 | <0.001 |
| PE(44:9(OH))               | - | 0.000  | 4656   | 0.000  | 2330   | 0.000 | <0.001 | <0.001 | <0.001 | <0.001 |
| LPC(16:1)                  | + | 0.000  | 4616   | 0.000  | 5377   | 0.000 | <0.001 | <0.001 | <0.001 | <0.001 |
| LPC(16:0)                  | + | 18841  | 4616   | 8692   | 5377   | 7647  | <0.001 | <0.001 | <0.001 | <0.001 |
| LPC(18:2)                  | + | 3861   | 35390  | 18841  | 4616   | 18841 | <0.001 | <0.001 | <0.001 | <0.001 |
| LPC(18:1)                  | + | 986.7  | 31479  | 986.7  | 31479  | 2664  | <0.001 | <0.001 | <0.001 | <0.001 |
| LPC(18:0)                  | + | 15366  | 187504 | 7399   | 151606 | 10504 | <0.001 | <0.001 | <0.001 | <0.001 |
| LPC(20:4)                  | + | 7049   | 0.000  | 39714  | 5527   | 0.000 | <0.001 | <0.001 | <0.001 | <0.001 |
| PC(34:2)                   | + | 0.000  | 0.000  | 12030  | 0.000  | 0.000 | <0.001 | <0.001 | <0.001 | <0.001 |
| PC(34:4)                   | + | 1910   | 0.000  | 7768   | 3482   | 0.000 | <0.001 | <0.001 | <0.001 | <0.001 |
| PC(34:2)                   | + | 200785 | 0.000  | 461328 | 0.000  | 0.000 | <0.001 | <0.001 | <0.001 | <0.001 |
| PC(34:1)                   | + | 191030 | 0.000  | 179388 | 0.000  | 1738  | <0.001 | <0.001 | <0.001 | <0.001 |
| PC(36:2)                   | + | 117896 | 0.000  | 254702 | 35028  | 0.000 | <0.001 | <0.001 | <0.001 | <0.001 |
| PC(38:4)                   | + | 264530 | 0.000  | 411929 | 0.000  | 0.000 | <0.001 | <0.001 | <0.001 | <0.001 |
| PC(40:8)                   | + | 0.000  | 9511   | 0.000  | 11310  | 0.000 | <0.001 | <0.001 | <0.001 | <0.001 |
| LPC(18:2(OH))              | + | 0.000  | 3241   | 15031  | 4260   | 0.000 | <0.001 | <0.001 | <0.001 | <0.001 |
| LPC(20:4(OH))              | + | 0.000  | 3657   | 47405  | 5527   | 0.000 | <0.001 | <0.001 | <0.001 | <0.001 |
| PC(25:0(COOH))             | + | 4267   | 14295  | 0.000  | 36881  | 0.000 | <0.001 | <0.001 | <0.001 | <0.001 |
| PC(34:2(OH))               | + | 0.000  | 17205  | 0.000  | 31331  | 1738  | <0.001 | <0.001 | <0.001 | <0.001 |
| PC(36:4(OH))               | + | 439050 | 16217  | 0.000  | 26043  | 0.000 | <0.001 | <0.001 | <0.001 | <0.001 |
| PC(36:3(OH))               | + | 0.000  | 14655  | 0.000  | 35028  | 0.000 | <0.001 | <0.001 | <0.001 | <0.001 |
| PC(36:2(OH))               | + | 0.000  | 7235   | 0.000  | 21394  | 0.000 | <0.001 | <0.001 | <0.001 | <0.001 |
| PC(38:4(OH))               | + | 0.000  | 8147   | 0.000  | 0.000  | 0.000 | <0.001 | <0.001 | <0.001 | <0.001 |
| LPS(20:0)                  | - | 0.000  | 2064   | 0.000  | 0.000  | 0.000 | <0.001 | <0.001 | ns     | <0.001 |
| PS(36:4)                   | - | 5036   | 0.000  | 1936   | 0.000  | 0.000 | <0.001 | <0.001 | <0.001 | <0.001 |
| PS(36:2)                   | - | 3698   | 0.000  | 2155   | 0.000  | 0.000 | <0.001 | <0.001 | <0.001 | <0.001 |
| PS(38:4)                   | - | 24856  | 0.000  | 14418  | 0.000  | 0.000 | <0.001 | <0.001 | <0.001 | <0.001 |
| PS(40:6)                   | - | 0.000  | 0.000  | 4317   | 550.8  | 0.000 | ns     | <0.001 | <0.001 | <0.001 |
| PS(34:0)-Me                | - | 0.000  | 1082   | 0.000  | 2284   | 0.000 | <0.001 | <0.001 | <0.001 | <0.001 |
| PS(38:4)-Me                | - | 0.000  | 2066   | 0.000  | 3126   | 0.000 | <0.001 | <0.001 | <0.001 | <0.001 |
| LPI((16:0)                 | - | 0.000  | 22761  | 0.000  | 10239  | 1850  | <0.001 | <0.001 | <0.001 | <0.001 |
| LPI(18:1)                  | - | 0.000  | 3894   | 0.000  | 10239  | 0.000 | <0.001 | <0.001 | <0.001 | <0.001 |
| LPI(18:0)                  | - | 1900   | 97652  | 1082   | 10239  | 23232 | <0.001 | <0.001 | <0.001 | <0.001 |
| PI(36:4)                   | - | 6808   | 3104   | 10013  | 3065   | 0.000 | <0.001 | <0.001 | <0.001 | <0.001 |
| PI(38:4)                   | - | 49327  | 25104  | 59462  | 18567  | 3092  | <0.001 | <0.001 | <0.001 | <0.001 |
| Sphingosine (d16:1-P)      | - | 0.000  | 1990   | 0.000  | 1817   | 0.000 | <0.001 | <0.001 | <0.001 | <0.001 |

|                         |   |       |       |       |       |       |        |        |        |        |
|-------------------------|---|-------|-------|-------|-------|-------|--------|--------|--------|--------|
| Ceramide (d42:1)        | + | 4371  | 0.000 | 0.000 | 36881 | 0.000 | <0.001 | <0.001 | <0.001 | <0.001 |
| SM(d34:1)               | + | 65823 | 2373  | 18846 | 0.000 | 0.000 | <0.001 | <0.001 | <0.001 | <0.001 |
| Cortisol                | - | 0.000 | 2121  | 0.000 | 1388  | 0.000 | <0.001 | <0.001 | ns     | <0.001 |
| Dihydrocortisol         | - | 0.000 | 3560  | 0.000 | 3424  | 0.000 | <0.001 | <0.001 | <0.001 | <0.001 |
| Cholesterol sulfate     | - | 46542 | 64394 | 4659  | 1920  | 0.000 | <0.001 | <0.001 | <0.001 | <0.001 |
| Taurodeoxycholic acid   | - | 0.000 | 3605  | 3710  | 2485  | 0.000 | <0.001 | <0.001 | <0.001 | <0.001 |
| Taurocholic acid        | - | 0.000 | 3417  | 10605 | 2233  | 0.000 | <0.001 | <0.001 | <0.001 | <0.001 |
| Hydroxy-cholecalciferol | + | 0.000 | 18286 | 0.000 | 14418 | 0.000 | <0.001 | <0.001 | <0.001 | <0.001 |
| CE(20:4)                | + | 3893  | 0.000 | 2569  | 0.000 | 0.000 | <0.001 | <0.001 | <0.001 | ns     |
| MG(18:1)                | + | 11166 | 0.000 | 69541 | 0.000 | 0.000 | <0.001 | <0.001 | <0.001 | <0.001 |
| MG(18:0)                | + | 31310 | 3196  | 23976 | 2801  | 0.000 | <0.001 | <0.001 | <0.001 | <0.001 |
| DG(32:0)                | + | 25206 | 3657  | 4254  | 0.000 | 0.000 | <0.001 | <0.001 | <0.001 | ns     |
| DG(34:2)                | + | 25206 | 0.000 | 4254  | 0.000 | 0.000 | <0.001 | <0.001 | <0.001 | ns     |
| DG(34:1)                | + | 13657 | 0.000 | 11047 | 0.000 | 0.000 | <0.001 | <0.001 | <0.001 | <0.001 |
| DG(36:4)                | + | 6643  | 0.000 | 6227  | 0.000 | 0.000 | <0.001 | <0.001 | <0.001 | <0.001 |
| DG(36:3)                | + | 5526  | 0.000 | 12291 | 0.000 | 0.000 | <0.001 | <0.001 | <0.001 | <0.001 |
| DG(38:4)                | + | 6654  | 0.000 | 12291 | 0.000 | 0.000 | <0.001 | <0.001 | <0.001 | <0.001 |

\* Median abundances determined from all pixel for each treatment group

\*\* Statistical significance determined using Kruskal-Wallis followed by Dunn's test for multiple comparisons,  $\alpha = 0.05$ ,  $n =$  Frozen Kidney 29587, Formalin-Fixed Kidney 22650, Frozen Liver 36374, Formalin-Fixed Liver 55233 and FFPE Liver 35543 considered pixel (Positive ion mode)/ Frozen Kidney 32300, Formalin-Fixed Kidney 25517, Frozen Liver 37022, Formalin-Fixed Liver 60958 and FFPE Liver 38569 considered pixel (Negative ion mode), ns = not significant

Figure S1:

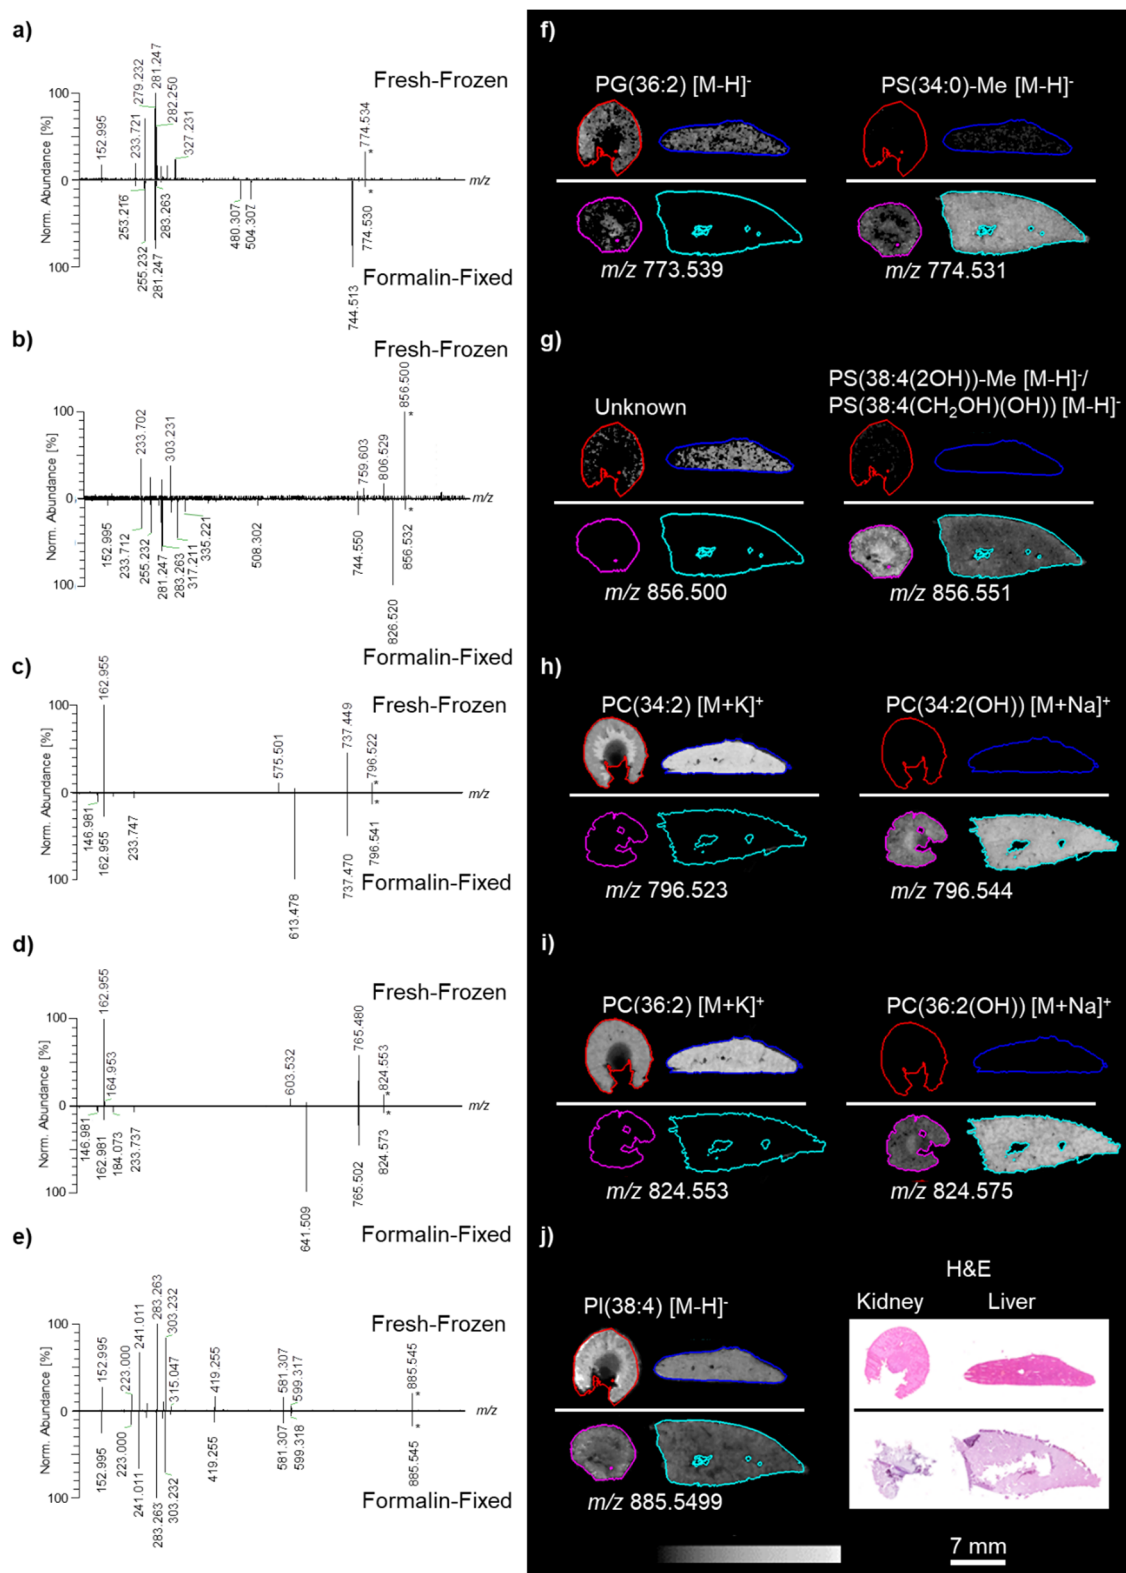

Figure S1: MS/MS spectra of heatmap lipids: in fresh-frozen (top) and formalin fixed liver (bottom) for a)  $m/z$  774.5 (negative ion mode), 856.5 (negative ion mode), 796.5 (positive ion mode), 824 (positive ion mode) and 885.5. The \* labels the respective precursor ions in each spectrum. a)  $m/z$  774.534 was found to correspond to the M+1 isotope of PG(36:2) detected as [M-H]<sup>-</sup>, identifiable through the strong abundance of isotopes of the fatty acids e.g.  $m/z$  282.250 as M+1 isotope of  $m/z$  281.247 corresponding to FA(18:1). Isolation of the same

precursor mass on formalin-fixed liver lead to the identification of PS(34:0)-methyl ester. The methylation was elucidated from the neutral loss of 30 Da ( $m/z$  774.530 to 744.513), which corresponds with the elimination of formaldehyde through comproportionation of the methanol and the carboxylic acid into the corresponding aldehydes. b) Isolation of  $m/z$  856.500 from fresh-frozen tissue results in an MS/MS spectrum that could not be elucidated. The neutral loss of 50 Da (from  $m/z$  856.500 to 806.529) indicates loss of  $\text{CH}_3\text{Cl}$ , which is indicative for phosphatidylcholines ionized as  $[\text{M}+\text{Cl}]^-$ , however, no reasonable structure could be elucidated matching the fatty acid chain composition. Isolated from formalin-fixed liver the MS/MS spectrum is dominated by the neutral loss of 30 Da indicating as above the formation of a methyl ester. The oxidation of the poly unsaturated FA(20:4), detected as shift of  $2 \times 16$  Da from  $m/z$  303.231 to  $m/z$  335.221 for the double oxidized fatty acid and  $m/z$  317.211 for the corresponding to the  $[\text{M}-\text{H}_2\text{O}-\text{H}]^-$  of FA(20:4(2OH)). The oxidation complicates the determination of the exact molecular species as the spectrum does not allow to exclude the possibility of the oxidized and N-formylated PS(38:4( $\text{CH}_2\text{OH}$ )(OH)). c/d). With the exception of MS/MS spectra obtained from PIs, the MS/MS spectra acquired from formalin-fixed samples showed overall more complexity than the MS/MS spectra for the same masses obtained from fresh-frozen specimens. e). Both precursor isolated from fresh-frozen tissue showed a neutral loss of 59 Da corresponding to the neutral loss of trimethylamine and a fragment ion detected at  $m/z$  162.955 corresponding to ethylene-cyclophosphane as  $[\text{M}+\text{K}]^+$  identifying the precursor as c) PC(34:2) and d) PC(36:2) detected as  $[\text{M}+\text{K}]^+$ . The MS/MS spectra acquired from formalin-fixed tissue share the same fragments as those from fresh-frozen tissue, but show an additional fragment at  $m/z$  146.981 corresponding to the above described ethylene-cyclophosphane fragment detected as  $[\text{M}+\text{Na}]^+$ . The most reasonable explanation for the presence of the fragment is a shift from c) PC(34:2) and d) PC(36:2) detected as  $[\text{M}+\text{K}]^+$  to PC(34:2(OH)) and PC(36:2(OH)) detected as  $[\text{M}+\text{Na}]^+$  respectively. f-j) display the annotation of the deconvoluted spectra and their respective distributions in fresh-frozen (top) and formalin-fixed (bottom kidney (left) and liver (right)).



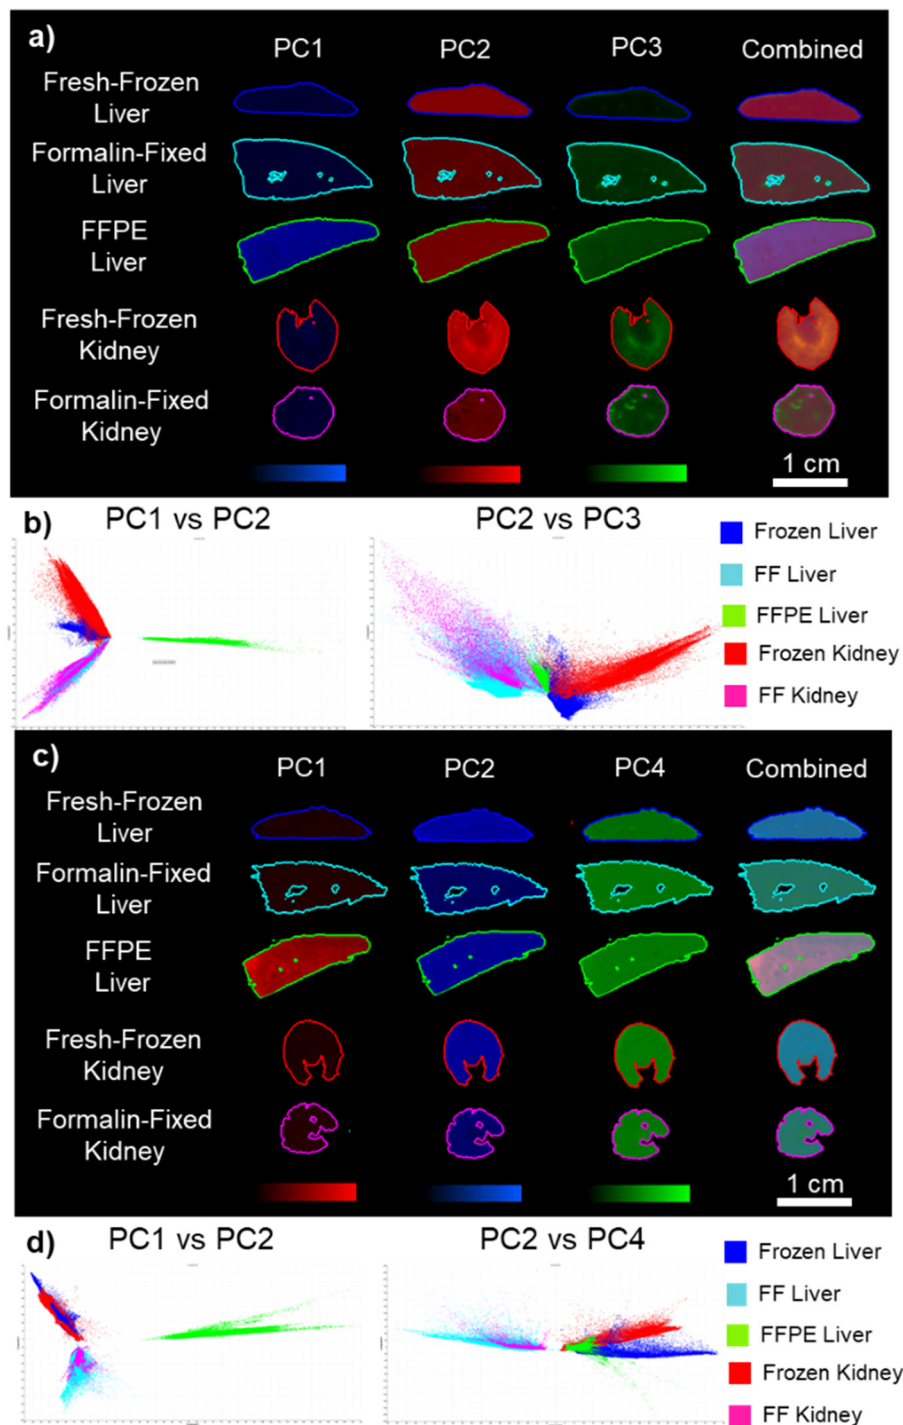

Figure S2: Pixel-wise PCA performed on sections from all tissue sections. a) shows the representative spatial PCA maps for fresh-frozen, formalin-fixed (FF) and FFPE liver as well as fresh-frozen and formalin-fixed kidneys analyzed in positive ion mode. b) Corresponding scoring plots for all samples, the left-hand side shows PC1 vs PC2 and the right-hand side PC2 vs PC3, respectively. Each datapoint represents a single spectrum. c) Representative spatial PCA maps for fresh-frozen, formalin-fixed and FFPE liver as well as fresh-frozen and formalin-fixed kidneys analyzed in negative ion mode. d) Corresponding scoring plots for all samples, the left-hand side shows PC1 vs PC2 and the right-hand side PC2 vs PC3, respectively. All displayed tissue sections originate from the same animal.

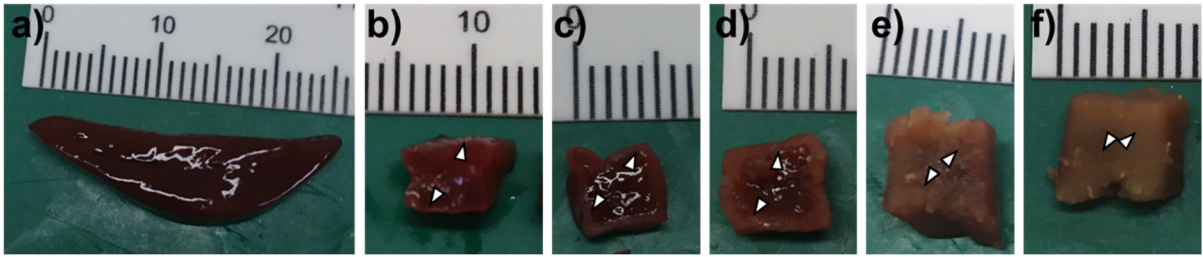

Figure S3: Progression of the fixation front in rat over time: a) Rat liver specimens of approximately 25 x 5 x 5 mm before fixation. The specimen was cut to expose the fixation front after b) 15 min, c) 30 min, d) 60 min, e) 120 min and f) 240 min in 4% formaldehyde solution. Arrowheads indicate the edge of the fixation front at the appropriate timepoints.

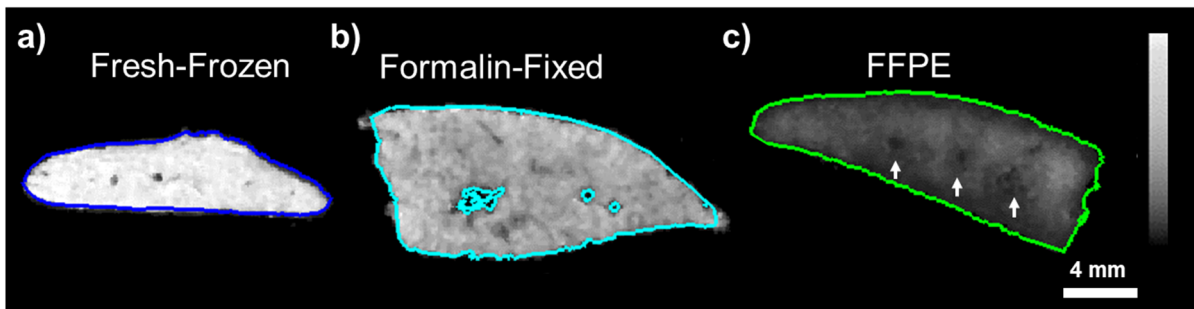

Figure S4: Distribution of PI(38:4) in a) fresh-frozen, b) formalin-fixed and c) formalin-fixed, paraffin embedded rat liver of the same animal. Arrows indicate areas of altered abundance of the lipid around larger blood vessel in the FFPE specimen.

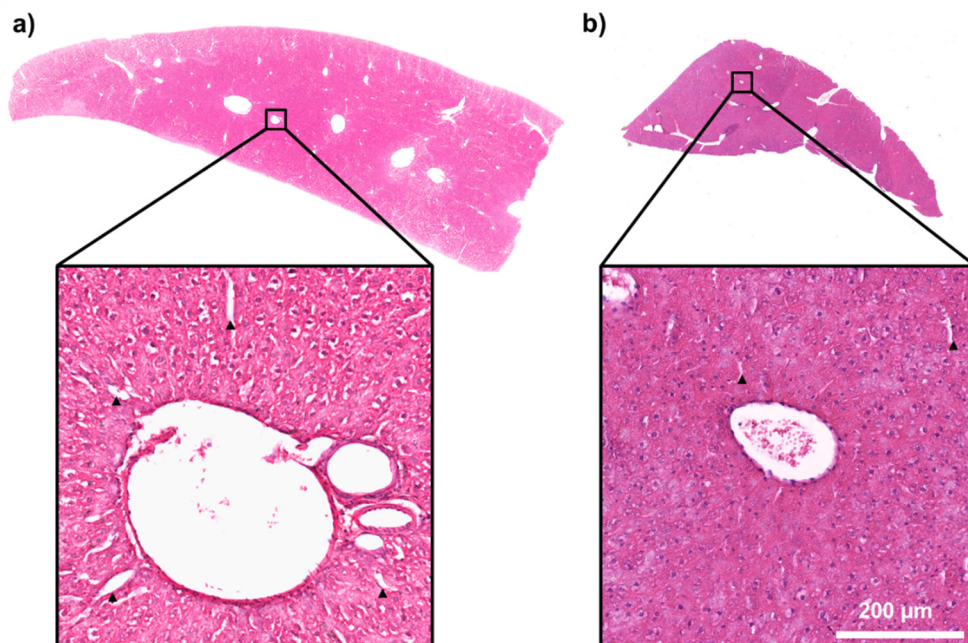

Figure S5: H&E stained FFPE sections prepared from tissue a) collected and stored in 10% formalin or b) snap-frozen upon collection and subsequently fixed in 10% formalin for 24 h before paraffin embedding. Sections were cut at 10 µm thickness, analogue to the sections analysed by MSI. The arrowheads indicate processing artefacts within the tissue sections.
